# Supplementary material for: Irisin Enhances Mitochondrial Function in Osteoclast Progenitors during Differentiation
Source: MDPI journal article supplement (doi:10.3390/biomedicines11123311), 2023-12-14
Supplement: s1 [file s1]

## Supplements

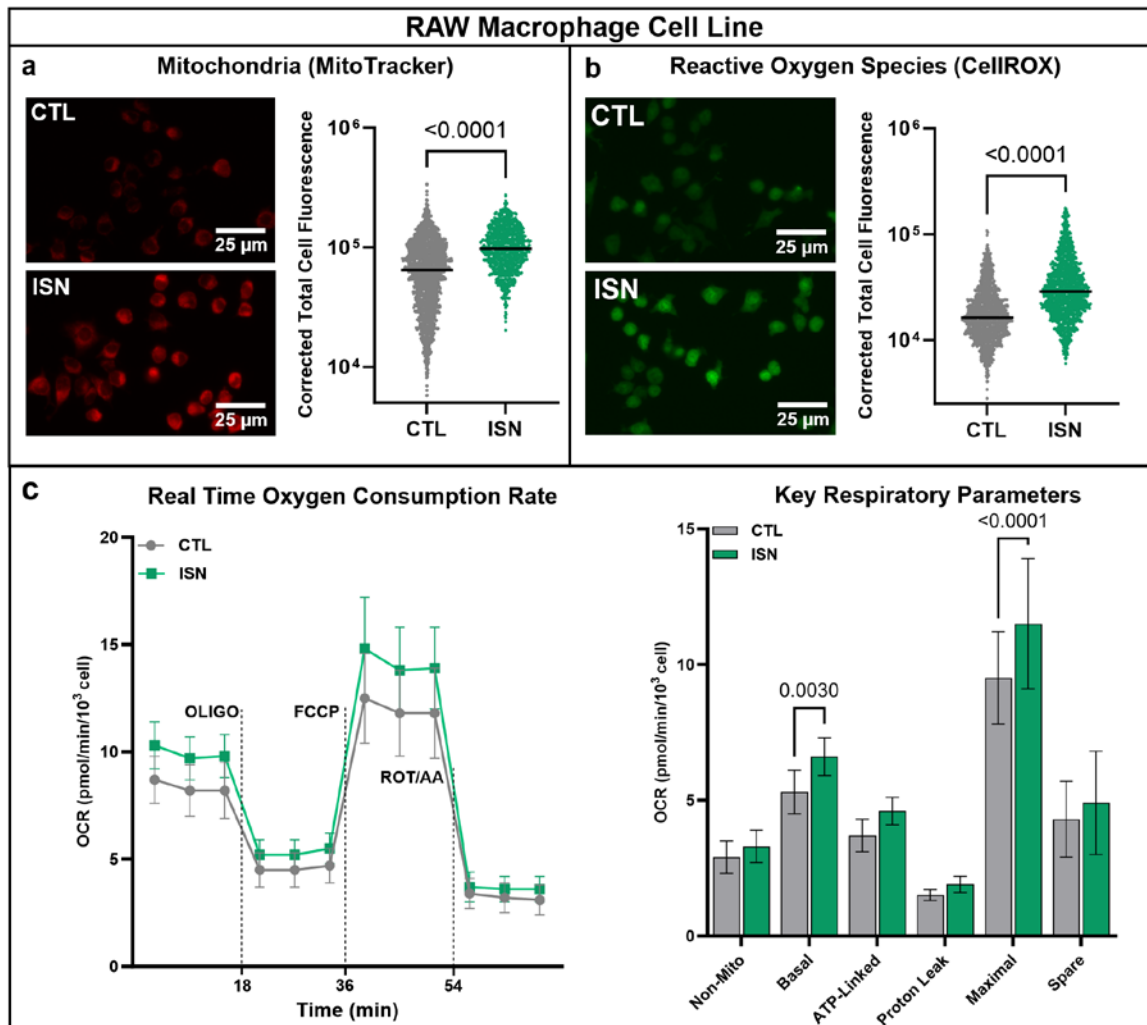

**Supplemental Figure S1.** Fluorescence imaging and metabolic analysis data from experimental repeats in RAW 264.7 macrophage cell line. Mitochondrial fluorescence via MitoTracker corrected total cell fluorescence significantly increased with 10 ng/mL of irisin (ISN) versus untreated controls (CTL) (a). Reactive oxygen species concentrations via CellROX corrected total cell fluorescence significantly increased with irisin treatment (b). Real-time oxygen consumption rates (OCR) elevated with irisin treatment, leading to increased basal and maximal respiration (c). *p*-values via unpaired, two-tailed Student's *t*-test (a,b) and 2-way ANOVA (c), with significant values ( $p < 0.05$ ) are displayed on graph.

**Supplemental Table S1.** Summary data of technical replicate number (n), mean, standard deviation (StDev), and *p*-value for experimental replicates in primary and RAW cell line osteoclasts (OCL).

| Metric                                              | Experiment    | Group | n    | Mean   | StDev  | P-value |
|-----------------------------------------------------|---------------|-------|------|--------|--------|---------|
| MitoTracker CTCF<br>(Arbitrary Units)               | Primary OCL 1 | CTL   | 734  | 142063 | 82220  | <0.0001 |
|                                                     |               | ISN   | 509  | 214165 | 140989 |         |
|                                                     | Primary OCL 2 | CTL   | 1341 | 67641  | 57318  | <0.0001 |
|                                                     |               | ISN   | 923  | 81922  | 71824  |         |
|                                                     | RAW OCL       | CTL   | 1886 | 70645  | 43974  | <0.0001 |
|                                                     |               | ISN   | 859  | 104107 | 42427  |         |
| CellROX CTCF<br>(Arbitrary Units)                   | Primary OCL 1 | CTL   | 657  | 40979  | 36034  | <0.0001 |
|                                                     |               | ISN   | 758  | 76617  | 58977  |         |
|                                                     | Primary OCL 2 | CTL   | 1200 | 45144  | 35614  | 0.0005  |
|                                                     |               | ISN   | 626  | 51034  | 32040  |         |
|                                                     | RAW OCL       | CTL   | 1347 | 20288  | 13350  | <0.0001 |
|                                                     |               | ISN   | 1231 | 36735  | 26948  |         |
| Non-Mito OCR<br>(pmol/min/10 <sup>3</sup> cells)    | Primary OCL 1 | CTL   | 23   | 1.5    | 0.5    | 0.9842  |
|                                                     |               | ISN   | 23   | 1.7    | 0.5    |         |
|                                                     | Primary OCL 2 | CTL   | 16   | 2.4    | 0.3    | 0.9999  |
|                                                     |               | ISN   | 16   | 2.5    | 0.4    |         |
|                                                     | RAW OCL       | CTL   | 20   | 2.9    | 0.6    | 0.8585  |
|                                                     |               | ISN   | 22   | 3.3    | 0.6    |         |
| Basal OCR<br>(pmol/min/10 <sup>3</sup> cells)       | Primary OCL 1 | CTL   | 23   | 3.1    | 0.9    | 0.8931  |
|                                                     |               | ISN   | 23   | 3.4    | 0.7    |         |
|                                                     | Primary OCL 2 | CTL   | 16   | 4.6    | 0.8    | 0.9565  |
|                                                     |               | ISN   | 16   | 4.9    | 0.5    |         |
|                                                     | RAW OCL       | CTL   | 20   | 5.3    | 0.8    | 0.003   |
|                                                     |               | ISN   | 22   | 6.6    | 0.7    |         |
| ATP-Linked OCR<br>(pmol/min/10 <sup>3</sup> cells)  | Primary OCL 1 | CTL   | 23   | 1.9    | 0.7    | 0.9842  |
|                                                     |               | ISN   | 23   | 2.1    | 0.5    |         |
|                                                     | Primary OCL 2 | CTL   | 16   | 3.1    | 0.6    | 0.9945  |
|                                                     |               | ISN   | 16   | 3.3    | 0.3    |         |
|                                                     | RAW OCL       | CTL   | 20   | 3.7    | 0.6    | 0.0877  |
|                                                     |               | ISN   | 22   | 4.6    | 0.5    |         |
| Proton Leak OCR<br>(pmol/min/10 <sup>3</sup> cells) | Primary OCL 1 | CTL   | 23   | 1.2    | 0.2    | 0.9997  |
|                                                     |               | ISN   | 23   | 1.3    | 0.3    |         |
|                                                     | Primary OCL 2 | CTL   | 16   | 1.5    | 0.3    | 0.9999  |
|                                                     |               | ISN   | 16   | 1.6    | 0.3    |         |
|                                                     | RAW OCL       | CTL   | 20   | 1.5    | 0.2    | 0.8585  |
|                                                     |               | ISN   | 22   | 1.9    | 0.3    |         |
| Maximal OCR<br>(pmol/min/10 <sup>3</sup> cells)     | Primary OCL 1 | CTL   | 23   | 8.5    | 1.6    | <0.0001 |
|                                                     |               | ISN   | 23   | 10.9   | 1.7    |         |
|                                                     | Primary OCL 2 | CTL   | 16   | 10.2   | 1.8    | 0.0064  |
|                                                     |               | ISN   | 16   | 11.4   | 1.8    |         |
|                                                     | RAW OCL       | CTL   | 20   | 9.5    | 1.7    | <0.0001 |
|                                                     |               | ISN   | 22   | 11.5   | 2.4    |         |
| Spare OCR<br>(pmol/min/10 <sup>3</sup> cells)       | Primary OCL 1 | CTL   | 23   | 5.4    | 1.3    | <0.0001 |
|                                                     |               | ISN   | 23   | 7.5    | 1.5    |         |
|                                                     | Primary OCL 2 | CTL   | 16   | 5.6    | 1.3    | 0.0785  |
|                                                     |               | ISN   | 16   | 6.5    | 1.6    |         |
|                                                     | RAW OCL       | CTL   | 20   | 4.3    | 1.4    | 0.4837  |
|                                                     |               | ISN   | 22   | 4.9    | 1.9    |         |
